# Supplementary material for: Development of a Problematic Khat Use Screening Test (PKUST-17) in Ethiopia: Classical Test Theory and Item Response Theory Analysis
Source: Oxford University Press journal article supplement (doi:10.1525/collabra.38064), 2022-01-01
Supplement: collabra_2022_8_1_38064_98677.docx [file collabra_2022_8_1_38064_98677.docx]

1. IRT discrimination (α) properties for the entire 54 items

| Items | Discrimination (α) |
| --- | --- |
| Pk22 | 2.439 |
| Pk21 | 2.350 |
| Pk31 | 2.338 |
| Pk26 | 2.268 |
| Pk18 | 2.214 |
| Pk27 | 2.010 |
| Pk23 | 1.935 |
| Pk5 | 1.867 |
| Pk32 | 1.838 |
| Pk6 | 1.792 |
| Pk28 | 1.778 |
| Pk50 | 1.703 |
| Pk1 | 1.693 |
| Pk29 | 1.686 |
| Pk47 | 1.645 |
| Pk30 | 1.549 |
| Pk4 | 1.456 |
| Pk33 | 1.398 |
| Pk40 | 1.311 |
| Pk35 | 1.219 |
| Pk46 | 1.212 |
| Pk48 | 1.130 |
| Pk43 | 1.101 |
| Pk11 | 1.098 |
| Pk20 | .971 |
| Pk41 | .969 |
| Pk36 | .952 |
| Pk10 | .931 |
| Pk7 | .862 |
| Pk8 | .855 |
| Pk2 | .800 |
| Pk17 | .738 |
| Pk44 | .679 |
| Pk25 | .666 |
| Pk42 | .638 |
| Pk38 | .620 |
| Pk12 | .522 |
| Pk15 | .488 |
| Pk24 | .463 |
| Pk19 | .428 |
| Pk3 | .346 |

2. Boundary characteristics curves for each

1. Category characteristic curves for the final 17 items
