# Supplementary material for: Development of a Problematic Khat Use Screening Test (PKUST-17) in Ethiopia: Classical Test Theory and Item Response Theory Analysis
Source: Oxford University Press journal article supplement (doi:10.1525/collabra.38064), 2022-01-01
Supplement: collabra_2022_8_1_38064_98678.docx [file collabra_2022_8_1_38064_98678.docx]

| Item | Mean | no of items correlated with | EFA/factor loading | SD | Item scale correlation | ICC(test retest) | Alpha deleted |
| --- | --- | --- | --- | --- | --- | --- | --- |
| Pk1 | 3.35 | 16 | .52 | 1.14 | .55 | .05 | .92 |
| pk2 | 1.65 | 5 | .43 | 1.63 | .37 | .48 | .92 |
| pk3 | 1.63 | 0 | .15 | 1.45 | .19 | .36 | .92 |
| pk4 | 2.67 | 19 | .44 | .92 | .57 | .23 | .92 |
| pk5 | 2.31 | 21 | .62 | 1.50 | .68 | .25 | .92 |
| pk6 | 2.04 | 19 | .62 | 1.45 | .65 | .32 | .92 |
| pk7 | 1.31 | 5 | .57 | 1.44 | .43 | .4 | .92 |
| pk8 | 1.46 | 5 | .45 | 1.48 | .45 | .22 | .92 |
| pk9 | .51 | 0 | .22 | 1.19 | .2 | -.002 | .92 |
| pk10 | 1.34 | 6 | .47 | 1.48 | .49 | .25 | .92 |
| pk11 | 1.45 | 15 | .59 | 1.53 | .54 | .39 | .92 |
| pk12 | 1.42 | 0 | .12 | 1.15 | .23 | .06 | .92 |
| pk13 | .84 | 1 | .43 | 1.45 | .13 | .25 | .92 |
| pk14 | .63 | 1 | .99 | 1.20 | .21 | .17 | .92 |
| pk15 | 1.36 | 0 | .95 | 1.55 | .25 | .15 | .92 |
| pk16 | .58 | 1 | .27 | 1.18 | .28 | .17 | .92 |
| pk17 | 2.71 | 4 | .34 | 1.1 | .36 | .2 | .92 |
| pk18 | 1.48 | 18 | .61 | 1.62 | .62 | .55 | .92 |
| pk19 | 2.39 | 0 | .15 | 1.68 | .26 | .15 | .92 |
| pk20 | 1.84 | 2 | .27 | 1.52 | .44 | .39 | .92 |
| pk21 | 2.28 | 20 | .67 | 1.55 | .54 | .17 | .92 |
| pk22 | 1.77 | 19 | .66 | 1.57 | .7 | .52 | .92 |
| pk23 | 1.59 | 16 | .46 | 1.68 | .6 | .45 | .92 |
| pk24 | 2.93 | 1 | .22 | 1.43 | .26 | .22 | .92 |
| pk25 | 1.16 | 0 | .19 | 1.69 | .3 | -.11 | .92 |
| pk26 | 1.55 | 21 | .61 | 1.56 | .67 | .44 | .92 |
| pk27 | 2.14 | 17 | .57 | 1.58 | .62 | .35 | .92 |
| pk28 | 1.77 | 16 | .94 | 1.58 | .62 | .44 | .92 |
| pk29 | 1.59 | 16 | .64 | 1.45 | .58 | .36 | .92 |
| pk30 | 1.44 | 15 | .4 | 1.55 | .55 | .22 | .92 |
| pk31 | 1.79 | 20 | .56 | 1.63 | .67 | .43 | .92 |
| pk32 | 1.99 | 23 | .56 | 1.52 | .63 | .4 | .92 |
| pk33 | 1.66 | 13 | .43 | 1.61 | .52 | .4 | .92 |
| pk34 | .7 | 2 | .32 | 1.12 | .31 | .21 | .92 |
| pk35 | 1.17 | 14 | .57 | 1.50 | .56 | .49 | .92 |
| pk36 | 1.25 | 8 | .48 | 1.31 | .47 | .47 | .92 |
| pk37 | .47 | 1 | .09 | 1.04 | .15 | .29 | .92 |
| pk38 | 2.2 | 20 | .23 | 1.59 | .31 | .23 | .92 |
| pk39 | .59 | 0 | .15 | 1.26 | .28 | .12 | .92 |
| pk40 | 1.45 | 22 | .67 | 1.43 | .6 | .42 | .92 |
| pk41 | 1.7 | 9 | .48 | 1.61 | .47 | .28 | .92 |
| pk42 | 1.78 | 4 | .22 | 1.73 | .36 | .08 | .92 |
| pk43 | 1.2 | 4 | .4 | 1.56 | .45 | .19 | .92 |
| pk44 | .6 | 2 | .37 | 1.06 | .35 | .43 | .92 |
| pk45 | .88 | 0 | .35 | 1.50 | .3 | .18 | .92 |
| pk46 | 1.27 | 9 | .62 | 1.51 | .49 | .03 | .92 |
| pk47 | 1.07 | 14 | .49 | 1.63 | .53 | .25 | .92 |
| Pk48 | 1.48 | 15 | .54 | 1.50 | .55 | .41 | .92 |
| pk49 | 1.35 | 25 | .56 | 1.54 | .66 | .13 | .92 |
| pk50 | 1.63 | 24 | .51 | 1.53 | .62 | .18 | .92 |

1. **Parallel analysis**

Principal Components

Specifications for this Run:

Ncases 352

Nvars 17

Ndatsets 100

Percent 95

Random Data Eigenvalues

Root Means Prcntyle

1.000000 1.409020 1.494815

2.000000 1.323044 1.365997

3.000000 1.255717 1.302918

4.000000 1.203507 1.245712

5.000000 1.151694 1.192196

6.000000 1.114240 1.143720

7.000000 1.066977 1.101426

8.000000 1.020585 1.048717

9.000000 .983208 1.015879

10.000000 .947224 .973650

11.000000 .906035 .939175

12.000000 .873264 .902780

13.000000 .831860 .867873

14.000000 .795766 .826760

15.000000 .753676 .786908

16.000000 .710127 .742347

17.000000 .654057 .689715

------ END MATRIX -----

1. **EFA analysis reports**

| **Communalities** | | |
| --- | --- | --- |
|  | Initial | Extraction |
| pk1 | .345 | .292 |
| pk50 | .393 | .434 |
| pk49 | .396 | .431 |
| pk40 | .413 | .598 |
| pk18 | .428 | .452 |
| pk21 | .608 | .671 |
| pk22 | .583 | .600 |
| pk23 | .422 | .441 |
| pk26 | .539 | .547 |
| pk27 | .475 | .463 |
| pk28 | .425 | .397 |
| pk30 | .380 | .351 |
| pk32 | .465 | .469 |
| pk5 | .503 | .489 |
| pk4 | .312 | .308 |
| pk33 | .269 | .260 |
| pk47 | .311 | .277 |
| Extraction Method: Maximum Likelihood. | | |

| **Total Variance Explained** | | | | | | | | | |
| --- | --- | --- | --- | --- | --- | --- | --- | --- | --- |
| Factor | Initial Eigenvalues | | | Extraction Sums of Squared Loadings | | | Rotation Sums of Squared Loadings | | |
| Total | % of Variance | Cumulative % | Total | % of Variance | Cumulative % | Total | % of Variance | Cumulative % |
| 1 | 7.301 | 42.946 | 42.946 | 6.758 | 39.754 | 39.754 | 6.759 | 39.762 | 39.762 |
| 2 | 1.235 | 7.266 | 50.212 | .722 | 4.245 | 43.999 | .720 | 4.237 | 43.999 |
| 3 | .956 | 5.621 | 55.833 |  |  |  |  |  |  |
| 4 | .861 | 5.062 | 60.895 |  |  |  |  |  |  |
| 5 | .765 | 4.500 | 65.395 |  |  |  |  |  |  |
| 6 | .663 | 3.903 | 69.298 |  |  |  |  |  |  |
| 7 | .634 | 3.730 | 73.028 |  |  |  |  |  |  |
| 8 | .601 | 3.536 | 76.564 |  |  |  |  |  |  |
| 9 | .581 | 3.419 | 79.983 |  |  |  |  |  |  |
| 10 | .527 | 3.100 | 83.083 |  |  |  |  |  |  |
| 11 | .508 | 2.989 | 86.072 |  |  |  |  |  |  |
| 12 | .472 | 2.778 | 88.850 |  |  |  |  |  |  |
| 13 | .462 | 2.715 | 91.564 |  |  |  |  |  |  |
| 14 | .424 | 2.491 | 94.056 |  |  |  |  |  |  |
| 15 | .385 | 2.264 | 96.320 |  |  |  |  |  |  |
| 16 | .354 | 2.085 | 98.405 |  |  |  |  |  |  |
| 17 | .271 | 1.595 | 100.000 |  |  |  |  |  |  |
| Extraction Method: Maximum Likelihood. | | | | | | | | | |

| **Factor Matrixa** | | |
| --- | --- | --- |
|  | Factor | |
| 1 | 2 |
| pk21 | .771 | -.276 |
| pk22 | .762 | -.136 |
| pk26 | .720 | -.169 |
| pk5 | .695 | .081 |
| pk32 | .683 | .050 |
| pk27 | .669 | -.127 |
| pk23 | .653 | -.121 |
| pk18 | .648 | -.181 |
| pk28 | .629 | -.038 |
| pk49 | .624 | .204 |
| pk50 | .610 | .249 |
| pk30 | .581 | -.115 |
| pk40 | .554 | .539 |
| pk1 | .538 | .049 |
| pk47 | .516 | .105 |
| pk4 | .512 | .213 |
| pk33 | .449 | .241 |
|  | | |
|  | | |

| **Goodness-of-fit Test** | | |
| --- | --- | --- |
| Chi-Square | df | Sig. |
| 179.082 | 103 | .000 |

| **Rotated Factor Matrixa** | | | |
| --- | --- | --- | --- |
|  | Factor | | |
| 1 | 2 | |
| pk21 | .770 | -.279 | |
| pk22 | .762 | -.139 | |
| pk26 | .720 | -.172 | |
| pk5 | .695 | .078 | |
| pk32 | .683 | .047 | |
| pk27 | .668 | -.130 | |
| pk23 | .653 | -.124 | |
| pk18 | .647 | -.183 | |
| pk28 | .629 | -.041 | |
| pk49 | .625 | .202 | |
| pk50 | .611 | .246 | |
| pk30 | .580 | -.118 | |
| pk40 | .557 | .537 | |
| pk1 | .538 | .046 | |
| pk47 | .516 | .103 | |
| pk4 | .513 | .211 | |
| pk33 | .450 | .239 | |
|  | | | |
| 1. **Correlation Matrix for the final 17 items** | | | | | | | | | | | | | | | | | | | | | |
|  | | | | | pk1 | pk50 | pk49 | pk40 | pk18 | pk21 | pk22 | pk23 | pk26 | pk27 | pk28 | pk30 | pk32 | pk5 | pk4 | pk33 | pk47 |
| Correlation | | | pk1 | | 1.000 | .339 | .349 | .299 | .248 | .443 | .354 | .316 | .349 | .446 | .289 | .312 | .385 | .477 | .349 | .241 | .221 |
| pk50 | | .339 | 1.000 | .459 | .471 | .332 | .414 | .438 | .351 | .358 | .388 | .403 | .326 | .434 | .452 | .320 | .314 | .369 |
| pk49 | | .349 | .459 | 1.000 | .463 | .382 | .421 | .428 | .406 | .432 | .414 | .380 | .325 | .414 | .419 | .334 | .329 | .367 |
| pk40 | | .299 | .471 | .463 | 1.000 | .271 | .265 | .374 | .318 | .314 | .297 | .311 | .224 | .406 | .433 | .373 | .389 | .363 |
| pk18 | | .248 | .332 | .382 | .271 | 1.000 | .552 | .513 | .464 | .522 | .434 | .448 | .394 | .443 | .410 | .291 | .272 | .329 |
| pk21 | | .443 | .414 | .421 | .265 | .552 | 1.000 | .664 | .535 | .551 | .560 | .467 | .451 | .517 | .533 | .335 | .268 | .379 |
| pk22 | | .354 | .438 | .428 | .374 | .513 | .664 | 1.000 | .521 | .616 | .489 | .478 | .398 | .472 | .525 | .334 | .348 | .390 |
| pk23 | | .316 | .351 | .406 | .318 | .464 | .535 | .521 | 1.000 | .538 | .452 | .370 | .362 | .430 | .454 | .302 | .255 | .279 |
| pk26 | | .349 | .358 | .432 | .314 | .522 | .551 | .616 | .538 | 1.000 | .528 | .433 | .473 | .465 | .449 | .312 | .338 | .371 |
| pk27 | | .446 | .388 | .414 | .297 | .434 | .560 | .489 | .452 | .528 | 1.000 | .402 | .387 | .529 | .414 | .327 | .230 | .249 |
| pk28 | | .289 | .403 | .380 | .311 | .448 | .467 | .478 | .370 | .433 | .402 | 1.000 | .489 | .473 | .448 | .281 | .229 | .415 |
| pk30 | | .312 | .326 | .325 | .224 | .394 | .451 | .398 | .362 | .473 | .387 | .489 | 1.000 | .387 | .459 | .278 | .219 | .352 |
| pk32 | | .385 | .434 | .414 | .406 | .443 | .517 | .472 | .430 | .465 | .529 | .473 | .387 | 1.000 | .437 | .402 | .338 | .328 |
| pk5 | | .477 | .452 | .419 | .433 | .410 | .533 | .525 | .454 | .449 | .414 | .448 | .459 | .437 | 1.000 | .438 | .286 | .332 |
| pk4 | | .349 | .320 | .334 | .373 | .291 | .335 | .334 | .302 | .312 | .327 | .281 | .278 | .402 | .438 | 1.000 | .368 | .279 |
| pk33 | | .241 | .314 | .329 | .389 | .272 | .268 | .348 | .255 | .338 | .230 | .229 | .219 | .338 | .286 | .368 | 1.000 | .189 |
| pk47 | | .221 | .369 | .367 | .363 | .329 | .379 | .390 | .279 | .371 | .249 | .415 | .352 | .328 | .332 | .279 | .189 | 1.000 |

All correlation coefficients are significant.
