# Supplementary material for: Development of a Problematic Khat Use Screening Test (PKUST-17) in Ethiopia: Classical Test Theory and Item Response Theory Analysis
Source: Oxford University Press journal article supplement (doi:10.1525/collabra.38064), 2022-01-01
Supplement: collabra_2022_8_1_38064_98679.docx [file collabra_2022_8_1_38064_98679.docx]

Version 1 PKU pool of items

Participant ID: ___/___/___/____

Interviewer ID: ___/___/___/____

Date: ___/___/___

Record start time: _______

Thank you for agreeing to take part in this brief interview about khat use. I am going to ask you some questions about your experience of using khat in the past three months.

1. During the past three months, how often do you chew khat?
2. Less than once in three months
3. One to three days in three months
4. One or two days per week
5. Three or four days per week
6. Daily or almost daily
7. During the past three months, how much bundles or grams of khat you chew?
8. Less than half a bundle or less than 100g
9. Half bundle or 100g
10. One(full) bundle or 200g
11. 1.5 bundles or 300g
12. More than 1.5 bundles or more than 300g
13. During the past three months, do you often chew more frequently than your friends?
14. No, never
15. Yes, sometimes
16. Yes, quite often
17. Yes, almost always
18. When do you usually chew khat? (More than one answers possible.)
19. Afternoon
20. Evening
21. Night
22. Morning
23. During the past three months, how often you chew khat before midday?
24. Never
25. Rarely
26. From time to time
27. Very often
28. Always
29. When you chew khat, what people do you usually chew with?
30. Always with friends
31. Usually with friends, but sometimes alone
32. Usually alone, and sometimes with friends
33. Always alone
34. During the past three months, how many hours you spent when you have been chewing khat per occasion?
35. A hour or less
36. One hour-3 hours
37. 3 hours- 6 hours
38. 6hours or more
39. What are (three of??) the most important reasons why you chew khat?
40. It is more recreational than drinking alcohol (0)
41. It is part of the culture (0)
42. For prayer (0)
43. To socialize with friends (0)
44. To be alert and concentrate during work (0)
45. If I didn’t chew, I cannot talk and work (1)
46. My body functions only when I chew(1)
47. Because I am addicted?(1)
48. During the past three months, how often you chew khat only because you like khat?
49. Never
50. Less than monthly
51. Monthly
52. Weekly
53. Daily or almost daily
54. During the past three months, how often have you failed to do what was normally expected from you because of chewing?
55. Never
56. Once or twice
57. Monthly
58. Weekly
59. Daily or almost daily
60. In the past three months, do you think your productivity is given up through time?
61. No, never
62. Yes, but not much
63. Yes, very much
64. In the past three months, how often do you skip going to work or spent the day without work because you don’t chew?
65. Never
66. Once or twice
67. Monthly
68. Weekly
69. Daily or almost daily
70. In the past three months, can you skip or discontinue your khat when you get an important affair?
71. No, never
72. Yes, sometimes
73. Yes, quite often
74. Yes, almost always
75. In the past three months, have you ever felt extremely frustrated because you couldn’t chew khat when you wanted to?
76. No, never
77. Yes, sometimes
78. Yes, quite often
79. Yes, almost always
80. In the past three months, how often do you put things off or procrastinate because you are on a state of mirqanna?
81. Never
82. Once or twice
83. Monthly
84. Weekly
85. Daily or almost daily
86. In the past three months, how often do you lack your motivation for work after you chew khat?
87. Never
88. Once or twice
89. Monthly
90. Weekly
91. Daily or almost daily
92. In the past three months, how often do you skip sau’lat, prayer time, go to mosque or church because of khat use?
93. Never
94. Once or twice
95. Monthly
96. Weekly
97. Daily or almost daily
98. Could you stop chewing khat whenever you want?[reverse coding]
99. No, I couldn’t
100. Maybe, but it would take me a lot of trouble
101. Probably, but not without some trouble
102. Sure, I would have no trouble at all
103. Have you ever tried to control, cut down or stop using khat?
104. No, never
105. Yes, in the past three months
106. Yes, but not in the past three months
107. Did you ever use khat after you had decided not to chew?
108. No, never
109. Yes, in the past three months
110. Yes, but not in the past three months
111. Has a friend or acquaintance of yours who also chew khat ever told you that you really need to cut down on khat?
112. No, never
113. Yes, in the past three months
114. Yes, but not in the past three months
115. Has a friend or acquaintance of yours ever told you that your behaviors (dressing, personal hygiene, communication) have been changing negatively?
116. No, never
117. Yes, in the past three months
118. Yes, but not in the past three months
119. During the past three months, what was the longest time you went without using khat?
120. A month and more
121. A week- one month
122. 1 day- 6days
123. A day and less
124. Do you experience distressing emotional or behavior symptoms when the khat is withdrawn?
125. No, never
126. Yes, sometimes
127. Yes, quite often
128. Yes, almost always
129. During the past three months, how often you experience serious altered cognition after you chew khat?
130. Never
131. Once or twice
132. Monthly
133. Weekly
134. Daily or almost daily
135. During the past three months, which one of the withdrawal experiences happened to you when you didn’t chew khat? (more than one answer is possible)
136. Depression or irritability
137. Dukak or vivid unpleasant dreams
138. Increased appetite
139. Increased sleep
140. Somatic symptoms; headache, abdominal pain, tear falling, yawning, blurring vision
141. None
142. During the past three months, when you reduced or stopped using khat, did you experience different withdrawal symptoms (Depression or irritability, Dukak or vivid unpleasant dreams, increased appetite, increased sleep, headache, abdominal pain)?
143. No, never
144. Yes, sometimes
145. Yes, always
146. During the past three months, how often did the prospect of missing khat or not chewing make you anxious or worried?
147. No, never
148. Sometimes
149. Quite often
150. Almost always
151. During the past three months, how often did you get in terrible when your khat chewing session arrives?
152. Never
153. Once or twice
154. Monthly
155. Weekly
156. Daily or almost daily
157. During the past three months, how often have you had a strong desire or urge to use-*harara?*
158. Never
159. Once or twice
160. Monthly
161. Weekly
162. Daily or almost daily
163. During the past three months, how often has your use of khat led to health, social, or financial problems?
164. Never
165. Less than monthly
166. Monthly
167. Weekly
168. Daily or almost daily
169. During the past three months, despite knowing the adverse effect of khat on your family life, business, health, do you continue chewing khat?
170. No, I already quit
171. No, I decreased the amount
172. Yes, I chew the same amount
173. Yes, even I chew an increased amount
174. In the past three months, how often your khat use led to health problems such as tooth spoil, gastric ulcer, hemorrhoids, loss of body weight.
175. Never
176. Once or twice
177. Monthly
178. Weekly
179. Daily or almost daily
180. During the past three months, how much money do you spend on khat in week?(Base your answer on what you pay or calculate the equivalent amount of khat if you don’t pay)
181. Less than 140 birr
182. 140-350 birr
183. 350 birr-525 birr
184. 525 birr- 700birr
185. More than 700birr
186. In the past three months, how often you are preoccupied with the thought of khat use?
187. Never
188. Less than monthly
189. Monthly
190. Weekly
191. Daily or almost daily
192. In the past three months, how often did you worry about your khat use?
193. Never
194. Less than monthly
195. Monthly
196. Weekly
197. Daily or almost daily
198. During the past three months, how much it is difficult to get the thought of khat out of your mind?[reverse coding]
199. No, I couldn’t
200. Maybe, but it would take me a lot of trouble
201. Probably, but not without some trouble
202. Sure, I would have no trouble at all
203. Have you found it difficult to get through a day without chewing khat? [reverse coding]
204. No, I wouldn’t be
205. Maybe, but it would take me a lot of trouble
206. Probably, but not without some trouble
207. Sure, I would have no trouble at all
208. In the past three months, how often do you skip meals or chew before having meals because of khat?
209. Never
210. Once or twice
211. Monthly
212. Daily or almost daily
213. During the past three months, how much you neglect your including poor self-care, poor sleep hygiene, skipping meal?
214. Never
215. Once or twice
216. Monthly
217. Weekly
218. Daily or almost daily
219. In the past three months, how often you need more khat than before to get the desired effect?
220. Never
221. Once or twice
222. Monthly
223. Weekly
224. Daily or almost daily
225. In the past three months, how often you drink khat tea or juice to get the desired effect of khat quickly?
226. Never
227. Once or twice
228. Monthly
229. Weekly
230. Daily or almost daily
231. In the past three months, how often experience confusion, excessive fear, talking irrelevant and perceptual disturbance?
232. Ever
233. Once or twice
234. Monthly
235. Daily or almost daily
236. In the past three months, how often you had a feeling of guilt or remorse because you chew khat?
237. Never
238. Once or twice
239. Monthly
240. Weekly
241. Daily or almost daily
242. In the past three months, how often your use of khat interfere with your work at school, job or your family life?
243. Never
244. Once or twice
245. Monthly
246. Weekly
247. Daily or almost daily
248. During the past three months, how often have you given up things you used to enjoy or were important because of khat?
249. Never
250. Once or twice
251. Monthly
252. Weekly
253. Daily or almost daily
254. During the past three months, do you think your personality and behavior changed negatively because of khat use?
255. Never
256. Yes, somewhat
257. Yes, very much
258. Yes, to a great extent
259. During the past three months, how often you chew khat in public including work place, meetings?
260. Never
261. Once or twice
262. Monthly
263. Weekly
264. Daily or almost daily
265. During the past three months, how often do you buy, carry or chew khat in public(for women)
266. Never
267. Once or twice
268. Monthly
269. Weekly
270. Daily or almost daily
271. In the past three months, how often you chew khat non-ceremonially such as without cleaning your-self (uedo), boiling coffee, furnishing?
272. Never
273. Once or twice
274. Monthly
275. Weekly
276. Daily or almost daily
277. In the past three months, how often your sleep is affected because you chew khat?
278. Never
279. Once or twice
280. Monthly
281. Weekly
282. Daily or almost daily
283. In the past three months, how often do your sexual or marital life was affected because of your khat use?
284. Never
285. Once or twice
286. Monthly
287. Weekly
288. Daily or almost daily
289. Do you prioritize khat than other important areas of life?
290. No, never
291. Yes, sometimes
292. Yes, quite often
293. Yes, almost always
294. In the past three months, how often you chew khat only with water?
295. Never
296. Once or twice
297. Monthly
298. Weekly
299. Daily or almost daily

| **Problematic khat use screening test version 1 (PKU)_Amharic Version**  የተሳታፊ ቁጥር፡___/____/____/___  የቃለ መጠይቅ አድራጊ ቁጥር____/____/___  ቀን______/________/______  ሰአት፡___________ | | | | |
| --- | --- | --- | --- | --- |
| የጫት አጠቃቀም መጠይቅ | | | | |
| በመቀጠልም ባለፈው ሶስት ወራት ስለነበሮት የጫት አቃቃም አንዳንድ ጥያቄዎች ይቀርብሎታል፡፡ ምክንያቱም ጫት ለአንዳንድ ሰዎች ችግር ስለሚሆንባቸው ነው፡፡ ስለዚህ የጫት አቃቃምዎንና የተያያዥ ማወቁ ጠቃሚ ነው፡፡ ስለሆነም እባክዎን ግልፅ እና ትክክለኛውን መረጃ በመስጠት ይተባበሩን፡፡ የእርስዎ ምላሽ ሚስጥራዊነቱ የተጠበቀ ነው፡፡ ስለዚህ በግልፅነት ሃሳቦን ይግለፁ፡፡  ሀ. ባለፉት ስድስት ወራት ውስጥ ጫት ቅመው ነበር? አዎ አይ | | | | |
| 1 | ባለፉት ሶስት ወራት ውስጥ በየስንት ጊዜው ጫት ይቅሙ ነበር? | ፈጽሞ አልቃምኩም [ምላሹ ይህ ከሆነ ወደ  ሚቀጥለው ክፍል ይለፉ] | 0 |  |
| አንድ ወይንም ሁለት ጊዜ | 1 |
| በወር አንድ ጊዜ | 2 |
| በሳምንት አንድ ጊዜ | 3 |
| በቀን በቀን | 4 |
| 2 | ባለፉት ሶስት ወራት ውስጥ ምን ያህል ዙርባ ወይም ግራም ጫት ይቅሙ ነበር? | ከግማሽ ዙርባ ያነሰ ወይንም ከ100ግ ያነሰ | 0 |  |
| ግማሽ ዙርባ ወይንም 100ግ | 1 |
| አንድ ሙሉ ዙርባ ወይንም 300ግ | 2 |
| አንድ ሙሉ ዙርባና ሌላ ግማሽ ዙርባ ወይንም ከ250ግ በላይ | 3 |
| ከአንድ ሙሉ ዙርባና ሌላ ግማሽ ዙርባ በላይ ወይንም ከ250ግ በላይ | 4 |
| 3 | ባለፉት ሶስት ወራት ውስጥ ከሌሎች ሰዎች (ጓደኛችዎ) አንፃር በብዙ ድግግሞሽ ይቅሙ ነበር? | አይ አልቅምም ነበር | 0 |  |
| አዎ አልፎ አልፎ | 1 |
| አዎ አብዛኛውን ጊዜ | 2 |
| አዎ ሁል ጊዜ | 3 |
|  | በአብዛኛው ጫት የሚቅሙት መቸ ነው (ከአንድ በላይ መመለስ ይቻላል? | አሰአት በኋላ | 1 |  |
|  | ማታ | 1 |
| 4 | ሌሊት | 1 |
|  | ጧት | 4 |
| 5 | ባለፉት ሶስት ወራት ውስጥ በምን ያክል ድግግሞሽ ከምሳ ሰአት በፊት ጫት ይቅማሉ? | ፈፅሞ አልቅምም | 0 |  |
| አንድ ወይንም ሁለት ጊዜ | 1 |
| በወር አንድ ጊዜ | 2 |
| በሳምንት አንድ ጊዜ | 3 |
| በየቀኑ ወይም ከሞላ ጎደል ሁልቀን | 4 |
| 6 | ጫት የሚቅሙት ከማን ጋር ነው? | ሁል ጊዜ ከጓደኞቸ ጋር | 1 |  |
| በአብዛኛው ካጓደኞቸ ጋር አንዳንድ ጊዜ ግን ብቻዬን | 2 |
| በአብዛኛው ብቻዬን አንዳንድ ጊዜ ከጓደኞቸ ጋር | 3 |
| ሁል ጊዜም ብቻዬን | 4 |
| 7 | ባለፉት ሶስት ወራት ወስጥ አንድ ጊዜ ጫት ለመቃም ከተቀመጡ ስንት ሰዓት ይቆያሉ? | አንድ ሰአት ወይም ከዚያ ያነሰ | 1 |  |
| 1_3 ሰአት | 2 |
| 3_6 ሰአት | 3 |
| ከ6 ሰአት የበለጠ | 4 |
| በየቀኑ ወይም ከሞላ ጎደል ሁልቀን | 5 |
| 8 | ጫት የሚቅሙት ለምንድን ነው? | አልኮል ከመጠጣት ይልቅ ጫት መቃም ስለሚያዝናናኝ | 0 |  |
| ባህል ስለሆነ | 0 |
| ለጸሎት(ለድዋ) | 0 |
| ከጓደኞቸ ጋር ለማውራት ለመጫዎት | 0 |
| ስራ ስሰራ ትኩረቴን ለመሰብሰብና ንቁ ስለሚያደርገኝ | 0 |
| ካልቃምኩ ከሰው ጋር ማውራት ስራ መስራት ስለማልችል | 1 |
| ሰውነቴ የሚንቀሳቀሰው ስቅም ብቻ ስለሆነ | 1 |
| ሱስ ሆኖብኝ | 1 |
| 9 | ባለፉት ሶስት ወራት ውስጥ ስራዬ ብለው መቃም ስለሚወዱ ብቻ በምን ያህል ጊዜ ድግግሞሽ ይቅማሉ? | ፈፅሞ ጫት ስራዬ ብዬ አልቅምም | 0 |  |
| በወር ከአንድ ጊዜ ያነሰ | 1 |
| በወር አንድ ጊዜ | 2 |
| በሳምንት አንድ ጊዜ | 3 |
| በየቀኑ ወይም ከሞላ ጎደል ሁልቀን | 4 |
|  |  |  |  |  |
|  |  |  |  |  |
|  |  |  |  |  |
| 10 | ባለፉት ሶስት ወራት ውስጥ በየስንት ጊዜው ጫት በመቃምዎ ምክንያት መስራት ያለብዎትን ስራ ሳይሰሩ ቀርተዋል? | ፈፅሞ ሳልሰራ አልቀረውም | 0 |  |
| በወር ከአንድ ጊዜ ያነሰ | 1 |
| በወር አንድ ጊዜ | 2 |
| በሳምንት አንድ ጊዜ | 3 |
| በየቀኑ ወይም ከሞላ ጎደል ሁልቀን | 4 |
| 11 | ባለፉት ሶስት ወራት ውስጥ ከጊዜ ጊዜ በሥራው ላይ ውጤታማ መሆንሆ ቀንሷል ብለው ያስባሉ? | ፈፅሞ አላስብም | 0 |  |
| አዎ ግን ይህን ያህል አይደለም | 1 |
| አዎ በጣም | 3 |
| 12 | ባለፉት ሶስት ወራት ውስጥ በምን ያህል ድግግሞሽ ጫት ስላልቃሙ ብቻ ሥራ ሳይሄዱ ወይም ስራ አቁመው ውለው ያውቃሉ? | በፍጹም አላውቅም | 0 |  |
| አንድ ወይንም ሁለት ጊዜ | 1 |
| በየወሩ | 2 |
| በየሳምንቱ | 3 |
| በቀን ወይንም ከሞላ ጎደል ሁል ቀን | 4 |
| 13 | ባለፉት ሶስት ወራት ውስጥ በምን ያህል ድግግሞሽ በጣም ወሳኝ ጉዳይ ሲያጋጥምዎ ጫት ሳይቅሙ ወይም እየቃሙ ከሆነ አቋርጠው ወደ ጉዳይዎ መሄድ ቸግሮዎታል? | አይ በፍጹም | 0 |  |
| አዎ አንዳንዴ | 1 |
| አዎ አብዛኛውን ጊዜ | 2 |
| አዎ ሁል ጊዜ | 3 |
| 14 | ባለፉት ሶስት ወራት ውስጥ ጫት መቃም ፈልገው መቃም አልችል ብለው ወይንም አልመቻችለዎት ብሎ ከፍተኛ ስጋት ተሰምቶዎት ያውቃል? | አይ በፍጹም | 0 |  |
| አዎ አንዳንዴ | 1 |
| አዎ አብዛኛውን ጊዜ | 2 |
| አዎ ሁል ጊዜ | 3 |
| 15 | ባለፉት ሶስት ወራት ውስጥ በምን ያህል ድግግሞሽ ጫት ከቃሙ በኋላ ወይም ምርቃና ላይ ሆነው መስራት ያለብዎትን ስራ ችላ የማለት ወይም ሌላ ቀን እሰራዋለሁ ብለው ያውቃሉ? | በፍጹም አላውቅም | 0 |  |
| አንድ ወይንም ሁለት ጊዜ | 1 |
| በየወሩ | 2 |
| በየሳምንቱ | 3 |
| በቀን ወይንም ከሞላ ጎደል ሁል ቀን | 4 |
| 16 | ባለፉት ሶስት ወራት ውስጥ በምን ያህል ድግግሞሽ ጫት ከቃሙ በኋላ ተነሳሽነትዎ ይቀንሳል? | በፍጹም አይቀንስም | 0 |  |
| አንድ ወይንም ሁለት ጊዜ | 1 |  |
| በየወሩ | 2 |  |
| በየሳምንቱ | 3 |
| በቀን ወይንም ከሞላ ጎደል ሁል ቀን | 4 |
| 17 | ባለፉት ሶስት ወራት ውስጥ በምን ያህል ድግግሞሽ ጫት በመቃምዎ ምክንያት ሰላት ወይም ፀሎት ማድረግ ሲኖርብዎ ሳያደርጉ ወይንም መስጅድ ወይም ቤተክርስቲያን መሄድ ሲኖርበወ መሄድ ሳይችሉ ቀርተው ያውቃሉ? | በፍጹም አላውቅም | 0 |  |
| አንድ ወይንም ሁለት ጊዜ | 1 |  |
| በየወሩ | 2 |  |
| በየሳምንቱ | 3 |
| በቀን ወይንም ከሞላ ጎደል ሁልቀን | 4 |
| 18 | ጫት መቃም ማቆም ከፈለጉ ምን ያህል ይችላሉ? | አይ አልችልም | 3 |  |
| ምናልባት እችል ይሆናል ግን ብዙ ያስቸግረኛል | 2 |
| ይመስለኛል እችላለው ትንሽ ቢያስቸግረኝ ነው | 1 |
| በእርግጠኝ ምንም አልቸገርም | 0 |
| 19 | ጫት መቃም ለመቀነስ ወይንም ለማቆም ሞክረው ያውቃሉ? | አይ በፍጹም | 0 |  |
| አዎ ባለፉት ሶስት ወራት ውስጥ | 2 |
| አዎ ግን ባለፉት ሶስት ወራት ውስጥ አይደለም | 1 |
| 20 | ጫት መቃም የለብኝም ብለው ካቆሙ በኋላ እንደገና መልሰው ቅመው ያውቃሉ? | አይ በፍጹም | 0 |  |
| አዎ ባለፉት ሶስት ወራት ውስጥ | 2 |
| አዎ ግን ባለፉት ሶስት ወራት ውስጥ አይደለም | 1 |
| 21 | ጓደኛዎ ወይም ሌላ የቅርብ ሰው ጫት መቃም ማቆም አለብዎት ብሎት ያውቃል? | አይ በፍጹም | 0 |  |
| አዎ ባለፉት ሶስት ወራት ውስጥ | 2 |
| አዎ ግን ባለፉት ሶስት ወራት ውስጥ አይደለም | 1 |
| 22 | ጓደኛዎ ወይም ሌላ የቅርብ ሰው ባህርይዎ ለምሳሌ አለባበስዎ የግል ንጽህና አጠባበቅዎ ንግግርዎ አሉታዊ በሆነ መልኩ ተቀይሯል ብለዎታል ያውቃል? | አይ በፍጹም | 0 |  |
| አዎ ባለፉት ሶስት ወራት ውስጥ | 2 |
| አዎ ግን ባለፉት ሶስት ወራት ውስጥ አይደለም | 1 |
| 23 | ባለፉት ሶስት ወራት ውስጥ ጫት ሳይቅሙ የሚቆዩበት ረጅሙ ሰዓት ስንት ነው? | አንድ ወርና ከዚያም በላይ | 1 |  |
| አንድ ሳምንት እስከ አንድ ወር | 2 |
| ከአንድ ቀን እስከ 6 ቀናት | 3 |
| አንድ ቀንና ከዚይም ያነሰ | 4 |
| 24 | ጫት ባልቃሙ ጊዜ የተለያዩ የሚረብሹ ስሜቶችና ባህሪያት ይታይብዎታል? | አይ በፍጹም | 0 |  |
| አዎ አንዳንዴ | 1 |
| አዎ አብዛኛውን ጊዜ | 2 |
| አዎ ሁል ጊዜ | 3 |
| 25 | ባለፉት ሶስት ወራት ውስጥ ጫት ከቃሙ በኋላ ለምን ያህል ድግግሞሽ የአእምሮ መለወጥ ወይንም የአስተሳሰብና አተያይዎ መቀየር ገጥሞት ያውቃል? | አላውቅም | 0 |  |
| አንድ ወይንም ሁለት ጊዜ | 1 |
| በየወሩ | 2 |
| በየሳምንቱ | 3 |
| በቀን ወይንም ከሞላ ጎደል ሁል ቀን | 4 |
| 26 | ባለፊት ሶስት ወራት ውስጥ ጫት ባልቃሙ ጊዜ የትኛዎቹ ስሜቶች ወይም ባህሪያት ታይተውበዎታል? [ከአንድ በላይ መልስ ይቻላል] | ድብርት ወይንም መነጫነጭ | 1 |  |
| ዱካክ ወይንም ቅዥት | 1 |
| የምግብ ፍላጎት መጨመር | 1 |
| እንቅልፍ መብዛት | 1 |
| የሰውነት ስሜቶች እንደ እራስ ምታት፡ የሆድ ህመም፡ እንባ እንባ ማለት ማዛጋት፡ እይታ ላይ ብዥታ | 1 |
| ምንም አይታይብኝም | 0 |
| 27 | ባለፊት ሶስት ወራት ውስጥ ጫት መቃም በመጠን ሲቀንሱ ወይም ሳይቅሙ ሲቀሩ የተለያዩ ስሜቶችና ባህሪያት እንደ ድብርት፣ መነጫነጭ፣ዱካክ ፣የምግብ ፍላጎት መጨመር፣ እንቅልፍ እንቅልፍ ማለት፣ እራስ ምታት፣ ሆድ ህመም በምን ያህል ድግግሞሽ ይሰማዎታል? | በፍጹም አይሰማኝም | 0 |  |
| አንድ ወይንም ሁለት ጊዜ | 1 |
| በየወሩ | 2 |
| በየሳምንቱ | 3 |
| በቀን ወይንም ከሞላ ጎደል ሁል ቀን | 4 |
| 28 | ባለፊት ሶስት ወራት ውስጥ ጫት አለመቃምን ሲያስቡት ወይም ጫት አለመቃምዎ ምን ያህል ያሳስብዎታል ወይም ያስጨንቅዎታል? | አይ በፍጹም | 0 |  |
| የተወሰነ | 1 |
| በጣም | 2 |
| እጅግ በጣም | 3 |
| 29 | ባለፊት ሶስት ወራት ውስጥ ጫት መቃሚያ ጊዜዎ ሲደርስ በምን ያህል ድግግሞሽ የመረበሽ ስሜት ይሰማዎታል? | በፍጹም አይሰማኝም | 0 |  |
| አንድ ወይንም ሁለት ጊዜ | 1 |
| በየወሩ | 2 |
| በየሳምንቱ | 3 |
| በቀን ወይንም ከሞላ ጎደል ሁል ቀን | 4 |  |
| 30 | ባለፉት ሶስት ወራት ውስጥ በምን ያህል ድግግሞሽ ጫት የመቃም ከፍተኛ ፍላጎት (ሀራራ) ነበረብዎት? | ኖሮኝ አያውቅም | 0 |  |
| አንድ ወይንም ሁለት ጊዜ | 1 |
| በየወሩ | 2 |
| በየሳምንቱ | 3 |
| በቀን ወይንም ከሞላ ጎደል ሁል ቀን | 4 |
| 31 | ባለፉት ሶስት ወራት ውስጥ ጫት በመቃምዎ ምክንያት በምን ያህል ድግግሞሽ የጤና፣ የማህበራዊ ወይም የገንዘብ ችግር እንዲያጋጥምዎ አድርጎዎታል? | አላደረገኝም | 0 |  |
| አንድ ወይንም ሁለት ጊዜ | 1 |
| በየወሩ | 2 |
| በየሳምንቱ | 3 |
| በቀን ወይንም ከሞላ ጎደል ሁል ቀን | 4 |
| 32 | ባለፉት ሶስት ወራት ውስጥ ጫት በጤና በማህበራዊ ወይንስ በገንዘብዎ ላይ ችግር ማድረሱን ቢገነዘቡም መቃምዎን ቀጥለዋል? | አይ አቁሜአለው | 0 |  |
| አይ ቀንሻለው | 1 |
| አዎ አሁንም የምቅመው እንደ በፊቱ ነው | 2 |
| አዎ እንዳውም ከበፊት የጨመረ ነው የምቅመው | 3 |
| 33 | ባለፉት ሶስት ወራት ውስጥ ጫት መቃምዎ በምን ያህል ድግግሞሽ የጤና ችግር (ጥርስ መበስበስ)፣ የጨጓራ ህመም፣ የኪንታሮት በሽታ፣ የሰውነት ክብደት መቀነስ፣ አድርሶብዎታል? | አይ አላደረሰብኝም | 0 |  |
| አንድ ወይንም ሁለት ጊዜ | 1 |
| በየወሩ | 2 |
| በየሳምንቱ | 3 |
| በቀን ወይንም ከሞላ ጎደል ሁል ቀን | 4 |
| 34 | ባለፉት ሶስት ወራት ውስጥ በሳምንት በአማካኝ ምን ያህል ብር ያወጣሉ? (ማስታወሻ የቀን የቀኑን ከነገሮት ለሳምንት ያስቡት? | ከ150ብር ያነሰ | 1 |  |
| 150_350 ብር | 2 |
| 350_550ብር | 3 |
| 550_750ብር | 4 |
| ከ750 ብር በላይ | 5 |
| 35 | ባለፉት ሶስት ወራት ውስጥ አእምሮዎ ስለጫት በማሰብ በምን ያህል ድግግሞሽ ይጠመዳል? | አይ | 0 |  |
| አንድ ወይንም ሁለት ጊዜ | 1 |
| በየወሩ | 2 |
| በየሳምንቱ | 3 |
| በቀን ወይንም ከሞላ ጎደል ሁል ቀን | 4 |
| 36 | ባለፉት ሶስት ወራት ውስጥ ስለ ጫት አቃቃምዎት በምን ያህል ድግግሞሽ ይጨነቃሉ? | አይ | 0 |  |
| አንድ ወይንም ሁለት ጊዜ | 1 |
| በየወሩ | 2 |
| በየሳምንቱ | 3 |
| በቀን ወይንም ከሞላ ጎደል ሁል ቀን | 4 |
| 37 | ባለፉት ሶስት ወራት ውስጥ ሥለጫት አለማሰብ ምን ያህል ይከብድዎታል? | አይ አለማሰብ አልችልም | 3 |  |
| ምን አልባት እችል ይሆናል ግን ብዙ | 2 |
| ይስቸግረኛል  እችል ይሆናል ትንሽ ቢያስቸግረኝ ነው | 1 |
| በእርግጠኝነት እችላለው ያለምንንም ችግር | 0 |
| 38 | ባለፉት ሶስት ወራት ውስጥ ጫት ሳይቅሙ አንድ ቀን ማሳለፍ ምን ያህል ያስቸግረዎታል? | አይ ምንም አልቸገርም | 0 |  |
| ምን አልባት ብዙ አይቸግረኝ ይሆናል | 1 |
| እችላለው ትንሽ ነው የምቸገረው | 2 |
| በእርግጠኝነት በጣም ያስቸግረኛል | 3 |
| 39 | ባለፉት ሶስት ወራት ውስጥ በምን ያህል ድግግሞሽ ምግብ ሳይበሉ ጫት ይቅማሉ ወይንም ከቃሙ በኋላ ምግብ አይበሉም? | አይ | 0 |  |
| አንድ ወይንም ሁለት ጊዜ | 1 |
| በየወሩ | 2 |
| በየሳምንቱ | 3 |
| በቀን ወይንም ከሞላ ጎደል ሁል ቀን | 4 |
| 40 | ባለፉት ሶስት ወራት እራስዎን ችላ ማለት (ንፅህና አጠባበቅ፣ አመጋገብ፣ በቂ እንቅልፍ አለማግኘትን) ጨምሮ በምን ያህል ድግግሞሽ ይታይብዎታል? | አይ | 0 |  |
| አንድ ወይንም ሁለት ጊዜ | 1 |
| በየወሩ | 2 |
| በየሳምንቱ | 3 |
| በቀን ወይንም ከሞላ ጎደል ሁል ቀን | 4 |
| 41 | ባለፉት ሶስት ወራት ውስጥ ለምን ያህል ድግግሞሽ የሚፈልጉ መነቃቃት ደረጃ ለመድረስ ከበፊት የጨመረ የጫት መጠን ይቅማሉ? | አይ | 0 |  |
| አንድ ወይንም ሁለት ጊዜ | 1 |
| በየወሩ | 2 |
| በየሳምንቱ | 3 |
| በቀን ወይንም ከሞላ ጎደል ሁል ቀን | 4 |
| 42 | ባለፉት ሶስት ወራት ውስጥ በምን ያህል ድግግሞሽ በጫት ለመነቃቃት የጫት ሻሂ ወይም ጫቱን አፍልተው ወይም በጭማቂ መልክ ይጠቀማሉ? | አይ | 0 |  |
| አንድ ወይንም ሁለት ጊዜ | 1 |
| በየወሩ | 2 |
| በየሳምንቱ | 3 |
| በቀን ወይንም ከሞላ ጎደል ሁል ቀን | 4 |
| 43 | ባለፉት ሶስት ወራት ውስጥ በምን ያህል ድግግሞሽ ጫት ከቃሙ በኋላ ወይም የምርቃና ስሜት ውስጥ ሆነው መወዛብ የፍርሀት ስሜት መቀባጠር ወይንም የተለዬ ነገር ተሰምቶዎታል? | አይ | 0 |  |
| አንድ ወይንም ሁለት ጊዜ | 1 |
| በየወሩ | 2 |
| በየሳምንቱ | 3 |
| በቀን ወይንም ከሞላ ጎደል ሁል ቀን | 4 |
| 44 | ባለፉት ሶስት ወራት ውስጥ በምን ያህል ድግግሞሽ ጫት ቃሚ በመሆንዎ የጥፋተኝነት ስሜት ወይንም ጸጸት ተሰምቶዎት ያውቃል? | አይ | 0 |  |
| አንድ ወይንም ሁለት ጊዜ | 1 |
| በየወሩ | 2 |
| በየሳምንቱ | 3 |
| በቀን ወይንም ከሞላ ጎደል ሁል ቀን | 4 |
| 45 | ባለፉት ሶስት ወራት ውስጥ በምን ያህል ድግግሞሽ ጫት መቃምዎ ሥራዎ ላይ ትምህርትዎ ላይ ወይም የቤተሰብ ኑሮዎ ላይ ጣልቃ ገብነት ነበረው? | አይ | 0 |  |
| አንድ ወይንም ሁለት ጊዜ | 1 |
| በየወሩ | 2 |
| በየሳምንቱ | 3 |
| በቀን ወይንም ከሞላ ጎደል ሁል ቀን | 4 |
| 46 | ባለፉት ሶስት ወራት ውስጥ በምን ያህል ድግግሞሽ በፊት እርካታ ያገኙባቸው የነበሩ ወይም በጣም ጠቃሚ የሚሏቸው ነገሮችን ችላ ብለዋቸዋል? | አይ | 0 |  |
| አንድ ወይንም ሁለት ጊዜ | 1 |
| በየወሩ | 2 |
| በየሳምንቱ | 3 |
| በቀን ወይንም ከሞላ ጎደል ሁል ቀን | 4 |
| 47 | ባለፉት ሶስት ወራት ውስጥ በምን ጫት በመቃምዎ ምክንያት ስብእናዎ ወይም ባህሪዎ ከበፊቱ በአሉታዊ መንገድ ተቀይሯል ይላሉ? | አይ በፍጹም | 0 |  |
| አዎ በተወሰነ ሁኔታ | 1 |
| አዎ በጣም ተቀይሯል | 2 |
| በእጅጉ ተቀይሯል | 3 |
| 48 | ባለፉት ሶስት ወራት ውስጥ በምን ያህል ጫት በአደባባይ እንዲሁም በስራ ቦታ ስብሰባ ውስጥ ይቅማሉ? | አይ | 0 |  |
| አንድ ወይንም ሁለት ጊዜ | 1 |
| በየወሩ | 2 |
| በየሳምንቱ | 3 |
| በቀን ወይንም ከሞላ ጎደል ሁል ቀን | 4 |
| 49 | ባለፉት ሶስት ወራት ውስጥ በምን ያህል ድግግሞሽ ጫት ገዝተሸ በይፋ ሰው እያየ ጫት ይዘሽ ወይም ሰው በሚያይበት ቦታ ትቅሚ ነበር? (ለሴት ብቻ) | አይ | 0 |  |
| አንድ ወይንም ሁለት ጊዜ | 1 |
| በየወሩ | 2 |
| በየሳምንቱ | 3 |
| በቀን ወይንም ከሞላ ጎደል ሁል ቀን | 4 |
| 50 | ባለፉት ሶስት ወራት ውስጥ በምን ያህል ድግግሞሽ ኡዱ ሳያደርጉ ቡና ሳያፈሉ ሳያነጥፉ በአጠቃላይ የጫት አቃቃም ስርአትን ሳይጠብቁ ይቅማሉ? | አይ | 0 |  |
| አንድ ወይንም ሁለት ጊዜ | 1 |
| በየወሩ | 2 |
| በየሳምንቱ | 3 |
| በቀን ወይንም ከሞላ ጎደል ሁል ቀን | 4 |
| 51 | ባለፉት ሶስት ወራት ውስጥ ጫት በመቃምዎ ምክንያት በምን ያህል ድግግሞሽ እንቅልፍዎ ላይ ችግር ተፈጥሮ ነበር? | አይ | 0 |  |
| አንድ ወይንም ሁለት ጊዜ | 1 |
| በየወሩ | 2 |
| በየሳምንቱ | 3 |
| በቀን ወይንም ከሞላ ጎደል ሁል ቀን | 4 |
| 52 | በባለፉት ሶስት ወራት ውስጥ ጫት በመቃምዎ ምክንያት በምን ያህል ድግግሞሽ የወሲብ ህይወትዎ ወይም ትዳርዎ ላይ ችግር ተፈጥሮብዎ ነበር? | አይ | 0 |  |
| አንድ ወይንም ሁለት ጊዜ | 1 |
| በየወሩ | 2 |
| በየሳምንቱ | 3 |
| በቀን ወይንም ከሞላ ጎደል ሁል ቀን | 4 |
| 53 | ጫት መቃምን ከሌሎች በህይወትዎ ዋጋ ከሚሰጧቸው ነገሮች ያስበልጡታል? | በፍጽም | 0 |  |
| አዎ አንዳንድ ጊዜ | 1 |
| አዎ ብዙ ጊዜ | 2 |
| አዎ ሁል ጊዜ | 3 |
| 54 | ባለፉት ሶስት ወራት ውስጥ በምን ያህል ድግግሞሽ ጫት በውሃ ብቻ ይቅማሉ? | አይ | 0 |  |
| አንድ ወይንም ሁለት ጊዜ | 1 |
| በየወሩ | 2 |
| በየሳምንቱ | 3 |
| በቀን ወይንም ከሞላ ጎደል ሁል ቀን | 4 |
